# Supplementary material
Source: MDPI journal article supplement (https://www.mdpi.com/2220-9964/12/6/242)
Supplement: s1 [file s1]

Landsat 8 image pair details.

| Image<br>Pair | Landsat ID            | Acquisition<br>Date | Cloud % |
|---------------|-----------------------|---------------------|---------|
| 1             | LC80150412014290LGN01 | 10/17/14            | 3.8     |
|               | LC80150422014290LGN01 |                     | 0.1     |
| 2             | LC80150412016024LGN01 | 1/24/16             | 31.5    |
|               | LC80150422016024LGN01 |                     | 1.3     |
| 3             | LC80150412016056LGN01 | 2/25/16             | 2.3     |
|               | LC80150422016056LGN01 |                     | 4.5     |
| 4             | LC80150412016296LGN01 | 10/22/16            | 2.5     |
|               | LC80150422016296LGN01 |                     | 0.5     |
| 5             | LC80150412017330LGN00 | 11/26/17            | 14.4    |
|               | LC80150422017330LGN00 |                     | 2.4     |
| 6             | LC80150412017346LGN00 | 12/12/17            | 0.4     |
|               | LC80150412017346LGN00 |                     | 0.1     |
